## RESEARCH ARTICLE

# The role of mobility in sexual risk behaviour and HIV acquisition among sub-Saharan African migrants residing in two European cities

Sónia Dias<sup>1,2\*</sup>, Ana Gama<sup>1,2</sup>, Jasna Loos<sup>3</sup>, Luis Roxo<sup>1</sup>, Daniel Simões<sup>4</sup>, Christiana Nöstlinger<sup>3</sup>

**1** NOVA National School of Public Health, Public Health Research Centre & Global Health and Tropical Medicine, Universidade NOVA de Lisboa, Lisboa, Portugal, **2** Comprehensive Health Research Centre (CHRC), Lisboa, Portugal, **3** Department of Public Health, Institute of Tropical Medicine, Antwerp, Belgium, **4** Grupo de Ativistas em Tratamentos, Lisboa, Portugal

\* [smfdias@yahoo.com](mailto:smfdias@yahoo.com)

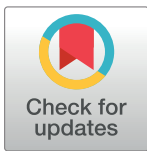

## Abstract

### OPEN ACCESS

**Citation:** Dias S, Gama A, Loos J, Roxo L, Simões D, Nöstlinger C (2020) The role of mobility in sexual risk behaviour and HIV acquisition among sub-Saharan African migrants residing in two European cities. *PLoS ONE* 15(2): e0228584. <https://doi.org/10.1371/journal.pone.0228584>

**Editor:** Joan A. Caylà, Agencia de Salut Publica de Barcelona, SPAIN

**Received:** April 17, 2019

**Accepted:** January 18, 2020

**Published:** February 5, 2020

**Copyright:** © 2020 Dias et al. This is an open access article distributed under the terms of the [Creative Commons Attribution License](https://creativecommons.org/licenses/by/4.0/), which permits unrestricted use, distribution, and reproduction in any medium, provided the original author and source are credited.

**Data Availability Statement:** All relevant data are within the manuscript and its Supporting Information file.

**Funding:** ChN was supported by Scientific Fund for Research on AIDS, managed by the King Baudouin Foundation (<http://www.kbs-frb.be>), project nr. 2011-R20640-001. SD was the Principal Investigator of the Portuguese survey which was supported by the Directorate-General for Health - National Program for the Prevention and Control of

## Background

Migrants from high endemic countries accounted for 18% of newly diagnosed HIV infections in Europe in 2017. Knowledge on the link between HIV risk and post-migration travels and their impact on HIV acquisition is scarce, but critical to inform prevention. This study aims to explore risky sexual behaviour and HIV-acquisition among sub-Saharan African migrants, and to assess post-migration mobility as a determinant of sexual risk behaviour.

## Methods

Data from two cross-sectional bio-behavioural surveys to assess HIV-prevalence conducted in Lisbon and Antwerp were analysed to explore migration-related characteristics, travel patterns, and sexual risk taking in the host country and abroad. Bi- and multivariate associations were estimated through adjusted odds ratios and 95% confidence intervals; multivariable logistic regression determined factors associated with condomless sexual intercourse.

## Results

Among N = 1508 participants above 18 years (58% males), 68% travelled post-migration (49.2% reported intercourse abroad). The overall proportion of condomless sex at last sexual intercourse was high (68.1%). The odds of condomless sex in the host country was five times higher when the last sexual intercourse abroad was also condomless [OR:5.32; 95% CI:2.98–9.25]. About half of the travellers reported concurrency, i.e. a regular partner in the host country while having other sexual partners abroad. Almost three percent of the participants reported being HIV+, but 5% had a reactive HIV test-result, with similar proportions

HIV/AIDS Infection (<http://www.dgs.pt/directorate-general-of-health/about-us.aspx>).

**Competing interests:** The authors have declared that no competing interests exist.

among travellers and non-travellers. Also, among the  $n = 75$  participants with reactive HIV test-results, condomless sex occurred ( $n = 40$ ) and was associated with mobility.

## Conclusions

Sub-Saharan African migrants are mobile and engage in sexual risk behaviours in the countries of residence and while travelling, increasing risk of post-migration HIV-acquisition. A transnational perspective on HIV prevention and sexual health promotion is needed for effectively reducing migrants' HIV risk related to their mobility.

## Introduction

People immigrating from high endemic countries to Europe are highly affected by HIV: 18% of all newly diagnosed cases with known origin in the European Union/European Economic Area in 2017 came from high HIV prevalence areas [1]. Data from the European Surveillance System for 29 European countries estimated that Sub-Saharan African migrants (SAM) represented 53% of all HIV cases reported among people born outside the reporting countries, in 2007–2012 [2]. Belgium and Portugal, the two countries where this study was conducted serve as typical examples for European countries with colonial links now affecting migration patterns. Both countries have high proportions of SAM among their populations of people living with HIV. In Belgium, surveillance data from 2016 show that 30% of all new HIV infections with known origin were reported among SAM [3]. In Portugal, which has one of the highest HIV prevalence rates in western Europe, 18.4% of newly diagnosed HIV cases in 2017 were reported among people born in sub-Saharan Africa (accounting for 57.6% of foreign-born newly diagnosed HIV cases with known origin) [4].

Given the high HIV burden in SAM populations, understanding HIV transmission risks has been a focus of HIV research [5]. Against the background of increasing evidence on post-migration HIV acquisition among SAM in Europe, shown to be as high as 45% for SAM in a European multi-centre study [6], it is important to better understand the HIV transmission dynamics in this group [7,8].

Surprisingly, the role of post-migration mobility as a driver for HIV acquisition has received little attention [9] when compared to the available body of research on individual-level factors such as low risk perception [10], risky sexual behaviours [11], community-level factors such as sexual networks [12] or structural factors such as poverty [13]. Research has shown that experiences during the migration trajectories from resource-limited regions to European destination countries increase vulnerability to HIV acquisition [6]. In a society characterised by increasing mobility [14], migrants may also travel after having settled in host countries for several reasons, such as social connections or family ties, the search for work or documents. The available evidence shows that travelling is associated with having new sexual partners, engaging in risky sexual behaviours, and becoming part of local sexual networks [12,15,16]. For instance, a study among ethnic minorities living in Amsterdam revealed that participants were exposed to substantial HIV risk while visiting their homelands [17]. Similarly, a study among SAM living in London reported that about half of the sample had travelled back to their countries of origin in the past five years. Of these, 40% of men and 21% of women had sex with a new partner when travelling [18]. However, most studies to date have addressed migrants' sexual behaviour only in the host country and have been confined to one city or country.

To inform evidence-based prevention planning for vulnerable populations such as SAM [19] obtaining reliable evidence on HIV acquisition risk requires a bio-behavioural data collection approach, including detailed information on mobility after settlement. Understanding the relationship between mobility and HIV risk among migrant populations in different European countries would allow for developing targeted national and transnational HIV policies and intervention programs to prevent new infections [20].

This study aimed to explore risky sexual behaviour and HIV-acquisition among SAM living in two European cities, and to assess their post-migration mobility as a determinant of sexual risk behaviour.

## Methods

This study draws on data from two cross-sectional bio-behavioural surveys conducted in Lisbon [21] and Antwerp [16] aiming to assess HIV prevalence, sexual risk behaviours and its determinants among SAM. Both bio-behavioural surveys adopted a similar community-based participatory research approach. Partner institutions and community-based organizations were deeply involved in every step of the study implementation. This assured the studies' acceptability and facilitating access to migrant communities, as well as adapted data collection procedures and instruments. This approach was employed to allow for knowledge generation addressing communities' health needs [22,23].

In both surveys, a venue-based sampling approach was used to recruit participants [24]. Based on formative research developed with community partners, a geographic and social mapping was conducted in both cities allowing for systematically identifying and listing venues usually frequented by SAM (e.g. bars, community associations, events and meetings of African organisations, shops, public places such as squares, parks and street corners). The Belgian survey used a two-stage time location sampling to recruit study participants. Sampling and recruitment procedures are described in detail elsewhere [16]. In brief, venues were selected with a probability proportion-to-size from the venues' sampling frame. In case of unavailability, the next venue on the list was selected. At each venue, 14 participants present at the time of data collection were randomly selected. In the Portuguese survey, recruitment teams of outreach workers from partner associations attended the venues listed through the geographic and social mapping in the formative research and systematically approached eight to 12 participants inviting them to participate in the study. The methods and procedures used are described in detail elsewhere [25].

The inclusion criteria in the surveys were being  $\geq 18$  years old and reporting a sub-Saharan African country of origin. Data were collected through a questionnaire (on a tablet in Belgium and on paper in Portugal). The questionnaires comprised close-ended questions on sociodemographic and migration-related characteristics, mobility, sexual behaviour, self-reported HIV status, HIV testing and other sexually transmitted infections (STI). Sociodemographic characteristics included sex, age, country of birth, relationship status, educational level and employment status. Migration-related characteristics assessed were time living in the host country and immigration status. Participants were also asked about post-migration mobility, i.e., if they had travelled to an African country and/or to another European country after settling in their host country. Regarding sexual behaviour, data were collected on the number of sexual partners in the last year, country of last sexual intercourse, type and origin of last sexual partner, as well as condom use in the host country and abroad. After responding to the questionnaire, participants' HIV status was assessed: in Belgium participants were asked to self-collect an oral fluid sample for HIV testing and in Portugal participants had a finger-stick whole-blood HIV-rapid test.

Ethical approval was obtained from the Institutional Review Board of the Institute of Tropical Medicine and the Ethical Committee of the University Hospital Antwerp for the Belgian survey, and from the Ethics Committee of Instituto de Higiene e Medicina Tropical for the Portuguese survey. All participants provided written informed consent before data collection. Confidentiality of data handling was guaranteed and emphasised when contacting the respondents to account for the sensitivity of the research topic. Data were pseudonymised to protect participants' privacy and to ensure that participants could not be identified through the data collected.

## Data analysis

Datasets were merged and analysed using IBM SPSS Statistics 23.0. The current analysis only considered participants who reported ever having had sexual relations. Participants were first described in terms of their sociodemographic and migration-related characteristics, mobility, sexual behaviour, HIV infection, HIV testing and other STI. These characteristics were compared between participants who had and who had not travelled after settling in their host countries ("travellers" vs. "non-travellers") using descriptive analysis and chi-square tests. In preliminary analyses, differences between participants traveling to African countries and those traveling to European countries were explored in terms of risky sexual behaviour, namely condomless sex and casual partner in the last sexual intercourse, as well as other main outcomes such as HIV testing and HIV status. However, no significant differences were found—participants who had travelled only to Africa (17.2%) and only to Europe (23.1%) did not significantly differ regarding condom use during the last intercourse ( $p = 0.488$ ), type of partner in the last intercourse ( $p = 0.408$ ), HIV testing ever ( $p = 0.090$ ) and HIV status ( $p = 0.262$ ). In addition, relatively small numbers of participants responded affirmatively to each variable ("travelled to an African country" and "travelled to a European country"), consequently limiting further statistical analyses. Therefore, the variables "travelled to an African country" and "travelled to a European country" were merged and a new variable was constructed: "having travelled abroad" defined "traveller" as people who, after settling in their host countries, had travelled outside that country for any reason. This allowed to explore differences between those travelling abroad (to both destinations) and those not travelling at all in terms of the outcome variables. Next, associations of condomless sex at last sexual intercourse with sociodemographic factors, mobility, sexual behaviour, HIV testing, self-reported HIV and STI were examined using multivariable logistic regression analysis. In order to analyse the use of condom accounting for known HIV status, a new variable was created combining the variables "ever had a HIV test" and "self-reported HIV status" into "HIV status based on the last HIV test". The related response options were: "Positive status", "Negative or unknown status" (unknown because results were not collected or received) and "Never tested for HIV". In addition, the association between condomless sex in the host country and abroad was examined through multivariable logistic regression analysis. Country of survey was included as a variable in all models, regardless of significance. Post-migration sexual behaviour and sexual relationships abroad and in the host country among travellers were compared using Chi-square tests. Concurrency of sexual relationships was analysed based on reported engagement in overlapping sexual relationships with different partners during the previous year. This variable was descriptively analysed in the overall sample and in further exploratory analyses in participants who reported intercourse abroad while having a sexual partner in the country of residence during the last five years. Finally, HIV-positive participants' mobility and sexual behaviour were explored using descriptive analysis. For all tests, statistical significance levels were set at  $<0.05$ . The magnitude of bivariate and multivariate associations was estimated by means of Odds Ratio and 95% confidence intervals calculated through logistic regression.

## Results

### Participants' sociodemographic characteristics, mobility and sexual behaviour

[Table 1](#) presents the characteristics of the total sample (N = 1508) which included 718 participants from Belgium (47.6%) and 790 participants from Portugal (52.4%). Male participants represented 58.0% of the total sample. Half of participants were between 30–49 years old and around a third were younger. Portugal had a larger proportion of participants older than 49 years than Belgium. Likewise, the majority had completed secondary education, but Belgium had a higher proportion of participants having completed higher education levels than Portugal. More Portuguese than Belgian study participants reported being non-employed. Half of the sample (50.5%) were living in the study country for more than 10 years, however, this proportion was larger among Portuguese compared to Belgian participants. Fourteen percent were of undocumented status, but this proportion was larger in Belgium than in Portugal.

Overall, 68.4% of participants had travelled to other countries after having settled in the study country ([Table 1](#)). Of these, 41.0% had travelled to both Africa and within Europe, 25.2% had travelled back to Africa, and 33.8% had travelled to Europe ([S1 Table](#)). Compared to participants not travelling, those who did travel were significantly older, reported more frequently to be married or in a stable relationship, to have completed higher education, to be employed, to live in the host country for more than 10 years, and to have regular immigration status ([Table 1](#)).

In terms of sexual behaviour, participants who had travelled reported more frequently that their last sexual intercourse was condomless ([Table 1](#)). No significant differences were found between travellers and non-travellers regarding type of last partner, origin of last partner and number of sexual partners during last year.

### HIV infection, HIV testing and other STI

In the total sample, 2.8% (n = 42) reported to be HIV positive ([Table 1](#)): 3.8% of women and 2.1% of men (p = 0.045, [S2A Table](#)). Overall, 5.0% (n = 75) had a reactive HIV test result (6.7% of women and 3.8% of men, p = 0.012). The proportion of reactive results was similar among travellers and non-travellers ([Table 1](#)), and among those with documented compared to those of undocumented status (5.1% and 4.8%, respectively, p = 0.872) ([S2B Table](#)).

Of participants with a reactive result to the HIV test, 46.7% (n = 35) self-reported being HIV negative or not knowing their serostatus. Overall, 38.9% of participants had never been tested for HIV. A total of 15.6% reported ever having been diagnosed with a STI. No significant differences were found for HIV testing and reported STI between travellers and non-travellers, nor between participants with documented and undocumented status.

### Condomless last sexual intercourse

Of the participants for whom data on condom use was available (n = 1444), 68.1% (n = 984) had not used condoms with their last partner ([Table 1](#)). The multivariable logistic regression analysis ([Table 2](#)) showed that condomless sex was more often reported by women, participants aged 30 and above, travellers, those whose last sexual partner was regular, those who were never tested for HIV and those who reported a negative or unknown status based on their last HIV test (compared to those who reported having tested positive in their last HIV test).

Among travellers who reported sexual encounters abroad, condomless sex was high: 70.7% (n = 612) when the last intercourse was in the host country and 62.5% (n = 317) when it was

Table 1. Characteristics of the total sample by study country and post-migration mobility.

|                                                       | Total<br>(N = 1508) |      | Belgian survey<br>(47.6%,<br>n = 718) |      | Portuguese<br>survey<br>(52.4%,<br>n = 790) |      | p-value | Travelled abroad            |      |                           |      | p-value |
|-------------------------------------------------------|---------------------|------|---------------------------------------|------|---------------------------------------------|------|---------|-----------------------------|------|---------------------------|------|---------|
|                                                       | n                   | %    | n                                     | %    | N                                           | %    |         | Yes<br>(68.4%,<br>n = 1031) |      | No<br>(31.6%,<br>n = 477) |      |         |
|                                                       |                     |      |                                       |      |                                             |      |         | n                           | %    | n                         | %    |         |
| <b>Sociodemographics</b>                              |                     |      |                                       |      |                                             |      |         |                             |      |                           |      |         |
| Sex (n = 1508)                                        |                     |      |                                       |      |                                             |      |         |                             |      |                           |      |         |
| Female                                                | 633                 | 42.0 | 301                                   | 41.9 | 332                                         | 42.0 | 0.999   | 416                         | 40.3 | 217                       | 45.5 | 0.064   |
| Male                                                  | 875                 | 58.0 | 417                                   | 58.1 | 458                                         | 58.0 |         | 615                         | 59.7 | 260                       | 54.5 |         |
| Age (n = 1508)                                        |                     |      |                                       |      |                                             |      |         |                             |      |                           |      |         |
| 18–29                                                 | 517                 | 34.3 | 251                                   | 35.0 | 266                                         | 33.7 | <0.001  | 296                         | 28.7 | 221                       | 46.3 | <0.001  |
| 30–49                                                 | 749                 | 49.7 | 411                                   | 57.2 | 338                                         | 42.8 |         | 545                         | 52.9 | 204                       | 42.8 |         |
| > 49                                                  | 242                 | 16.0 | 56                                    | 7.8  | 186                                         | 23.5 |         | 190                         | 18.4 | 52                        | 10.9 |         |
| Relationship status (n = 1479)                        |                     |      |                                       |      |                                             |      |         |                             |      |                           |      |         |
| In a relationship/married/civil partnership           | 730                 | 49.4 | 417                                   | 60.5 | 313                                         | 39.6 | <0.001  | 537                         | 52.9 | 193                       | 41.6 | <0.001  |
| Single/divorced/separated/widowed                     | 749                 | 50.6 | 272                                   | 39.5 | 477                                         | 60.5 |         | 478                         | 47.1 | 271                       | 58.4 |         |
| Educational level (n = 1490)                          |                     |      |                                       |      |                                             |      |         |                             |      |                           |      |         |
| Elementary education/no school education              | 333                 | 22.3 | 123                                   | 17.6 | 210                                         | 26.6 | <0.001  | 218                         | 21.3 | 115                       | 24.5 | <0.001  |
| Secondary education                                   | 864                 | 58.0 | 329                                   | 47.0 | 535                                         | 67.7 |         | 574                         | 56.2 | 290                       | 62.0 |         |
| Higher education                                      | 293                 | 19.7 | 248                                   | 35.4 | 45                                          | 5.7  |         | 230                         | 22.5 | 63                        | 13.5 |         |
| Employment status (n = 1411)                          |                     |      |                                       |      |                                             |      |         |                             |      |                           |      |         |
| Employed                                              | 603                 | 42.7 | 321                                   | 51.7 | 282                                         | 35.7 | <0.001  | 464                         | 47.9 | 139                       | 31.4 | <0.001  |
| Non employed                                          | 808                 | 57.3 | 300                                   | 48.3 | 508                                         | 64.3 |         | 505                         | 52.1 | 303                       | 68.6 |         |
| Time living in the study country (n = 1448)           |                     |      |                                       |      |                                             |      |         |                             |      |                           |      |         |
| Less than 5 years                                     | 405                 | 28.0 | 282                                   | 42.9 | 123                                         | 15.6 | <0.001  | 187                         | 18.9 | 218                       | 47.3 | <0.001  |
| Between 5 and 10 years                                | 312                 | 21.5 | 164                                   | 24.9 | 148                                         | 18.7 |         | 207                         | 21.0 | 105                       | 22.8 |         |
| More than 10 years                                    | 731                 | 50.5 | 212                                   | 32.2 | 519                                         | 65.7 |         | 593                         | 60.1 | 138                       | 29.9 |         |
| Immigration status (n = 1507)                         |                     |      |                                       |      |                                             |      |         |                             |      |                           |      |         |
| Documented                                            | 1294                | 85.9 | 585                                   | 81.6 | 709                                         | 89.7 | <0.001  | 930                         | 90.2 | 364                       | 76.5 | <0.001  |
| Undocumented                                          | 213                 | 14.1 | 132                                   | 18.4 | 81                                          | 10.3 |         | 101                         | 9.8  | 112                       | 23.5 |         |
| <b>Sexual behaviours and relationships</b>            |                     |      |                                       |      |                                             |      |         |                             |      |                           |      |         |
| Used condom with last partner (n = 1444)              |                     |      |                                       |      |                                             |      |         |                             |      |                           |      |         |
| Yes                                                   | 460                 | 31.9 | 222                                   | 32.6 | 238                                         | 31.2 | 0.543   | 297                         | 29.6 | 163                       | 37.0 | 0.007   |
| No                                                    | 984                 | 68.1 | 458                                   | 67.4 | 526                                         | 68.8 |         | 706                         | 70.4 | 278                       | 63.0 |         |
| Type of last partner (n = 1398)                       |                     |      |                                       |      |                                             |      |         |                             |      |                           |      |         |
| Regular                                               | 1035                | 74.0 | 504                                   | 78.3 | 531                                         | 70.4 | 0.001   | 727                         | 74.8 | 308                       | 72.3 | 0.354   |
| Casual                                                | 363                 | 26.0 | 140                                   | 21.7 | 223                                         | 29.6 |         | 245                         | 25.2 | 118                       | 27.7 |         |
| Origin of last partner (n = 1427)                     |                     |      |                                       |      |                                             |      |         |                             |      |                           |      |         |
| African                                               | 1038                | 72.4 | 504                                   | 73.7 | 534                                         | 71.9 | 0.442   | 720                         | 73.1 | 318                       | 71.9 | 0.653   |
| Other                                                 | 389                 | 27.6 | 180                                   | 26.3 | 209                                         | 28.1 |         | 265                         | 26.9 | 124                       | 28.1 |         |
| Number of sexual partners during last year (n = 1508) |                     |      |                                       |      |                                             |      |         |                             |      |                           |      |         |
| <2                                                    | 1214                | 80.5 | 578                                   | 80.5 | 636                                         | 80.5 | 0.999   | 830                         | 80.5 | 384                       | 80.5 | 0.999   |
| ≥3                                                    | 294                 | 19.5 | 140                                   | 19.5 | 154                                         | 19.5 |         | 201                         | 19.5 | 93                        | 19.5 |         |
| <b>HIV status, HIV testing and other STI</b>          |                     |      |                                       |      |                                             |      |         |                             |      |                           |      |         |
| Self-reported HIV status (n = 1504)                   |                     |      |                                       |      |                                             |      |         |                             |      |                           |      |         |
| Positive                                              | 42                  | 2.8  | 14                                    | 2.0  | 28                                          | 3.5  | 0.063   | 28                          | 2.7  | 14                        | 3.0  | 0.866   |
| Negative/Don't know                                   | 1462                | 97.2 | 700                                   | 98.0 | 762                                         | 96.5 |         | 1002                        | 97.3 | 460                       | 97.0 |         |
| Result of HIV test (n = 1491)                         |                     |      |                                       |      |                                             |      |         |                             |      |                           |      |         |
| Reactive                                              | 75                  | 5.0  | 32                                    | 4.6  | 43                                          | 5.4  | 0.477   | 47                          | 4.6  | 28                        | 5.9  | 0.308   |

(Continued)

Table 1. (Continued)

|                                | Total<br>(N = 1508) |      | Belgian survey<br>(47.6%,<br>n = 718) |      | Portuguese<br>survey<br>(52.4%,<br>n = 790) |      | p-value | Travelled abroad            |      |                           |      | p-value |
|--------------------------------|---------------------|------|---------------------------------------|------|---------------------------------------------|------|---------|-----------------------------|------|---------------------------|------|---------|
|                                | n                   | %    | n                                     | %    | N                                           | %    |         | Yes<br>(68.4%,<br>n = 1031) |      | No<br>(31.6%,<br>n = 477) |      |         |
| Negative                       | 1416                | 95.0 | 669                                   | 95.4 | 747                                         | 94.6 |         | 972                         | 95.4 | 444                       | 94.1 |         |
| Ever had a HIV test (n = 1460) |                     |      |                                       |      |                                             |      |         |                             |      |                           |      |         |
| Yes                            | 892                 | 61.1 | 508                                   | 72.9 | 384                                         | 50.3 | <0.001  | 627                         | 62.4 | 265                       | 58.2 | 0.147   |
| No                             | 568                 | 38.9 | 189                                   | 27.1 | 379                                         | 49.7 |         | 378                         | 37.6 | 190                       | 41.8 |         |
| Self-reported STI (n = 1412)   |                     |      |                                       |      |                                             |      |         |                             |      |                           |      |         |
| Yes                            | 220                 | 15.6 | 88                                    | 13.3 | 132                                         | 17.6 | 0.027   | 158                         | 16.2 | 62                        | 14.2 | 0.383   |
| No                             | 1192                | 84.4 | 574                                   | 86.7 | 618                                         | 82.4 |         | 817                         | 83.8 | 375                       | 85.8 |         |

<https://doi.org/10.1371/journal.pone.0228584.t001>

abroad (Table 3). Almost half of travellers reported condomless sex in both settings (48.7%, n = 137), while 30.3% (n = 85) reported condomless sex in one of the settings, and 21.0% (n = 59) reported consistent protected sex (S3A Table).

Condomless sex at last sexual encounter in the host country occurred more often among those who also reported no condom use abroad [OR: 5.32; 95% CI: 2.98–9.25] when controlled for gender, age, educational level, relationship status, country of the survey, type of partner, origin of last partner and number of sexual partners over the last year (S3B Table). Condomless sex was more frequent with a regular partner and with an African partner, both abroad and in the host country (Table 3). The proportion of condomless sex during the last intercourse in an African country was 65.6% (n = 231) and in an European country was 59.3% (n = 127). This was higher with regular partners (in Africa: 82.1% vs. 39.0% with casual partners; in Europe: 77.0% vs. 39.8% with casual partners), and with African partners (in Africa: 67.4% vs. 38.5% with non-African partners; in Europe: 64.1% vs. 53.9% with non-African partners) (S3C Table).

### Concurrent sexual relationships

Overall, engagement in concurrent sexual relationships in the previous year was more common among participants who had travelled abroad than those not travelling (28.9% vs. 23.8%, p = 0.048). The majority of participants who reported intercourse abroad during the last five years had a sexual partner in the host country and simultaneously, while being abroad (in Europe or in Africa), reported sexual encounters with another sexual partner. Also, around 39% of these participants reported concurrent sexual partnerships in the previous year. The last sexual partner abroad was either living abroad or was met there (i.e. 50.5% had a regular partner in the host country and a partner abroad; 27.7% had a casual partner in the host country and a partner met or living abroad) (Table 4). Most frequently, the last sexual partner in both host country and abroad was an African partner (73.3%), although a fourth reported that their last sexual partner was non-African.

### HIV-positive participants: sexual risk behaviour and mobility

Among the 75 participants with reactive HIV test-results, 39 reported condomless sex during their last sexual intercourse. More than half of them (n = 47) had travelled to other countries, and among them about half reported sexual intercourse abroad (n = 25) (Table 5). The majority of them did not report condom use with their last sexual partner abroad (n = 21). For most

Table 2. Factors associated with condomless last sexual intercourse.

|                                                       | Crude OR<br>(95% CI) | p-value | Adjusted OR<br>(95% CI) * | p-value |
|-------------------------------------------------------|----------------------|---------|---------------------------|---------|
| Sex                                                   |                      |         |                           |         |
| Male                                                  | 1                    |         | 1                         |         |
| Female                                                | 2.25 (1.78–2.86)     | <0.001  | 1.89 (1.39–2.57)          | <0.001  |
| Age                                                   |                      |         |                           |         |
| 18–29                                                 | 1                    |         | 1                         |         |
| 30–49                                                 | 1.68 (1.32–2.14)     | <0.001  | 1.80 (1.33–2.43)          | <0.001  |
| > 49                                                  | 2.20 (1.55–3.14)     | <0.001  | 2.46 (1.53–3.98)          | <0.001  |
| Educational level                                     |                      |         |                           |         |
| Primary education or less/no school                   | 1                    |         | 1                         |         |
| Secondary or less                                     | 0.70 (0.52–0.93)     | 0.016   | 0.90 (0.61–1.33)          | 0.610   |
| Higher education                                      | 0.74 (0.52–1.06)     | 0.100   | 0.68 (0.42–1.09)          | 0.112   |
| Relationship status                                   |                      |         |                           |         |
| Single                                                | 1                    |         | 1                         |         |
| In a relationship                                     | 1.01 (0.81–1.27)     | 0.912   | 1.33 (1.01–1.75)          | 0.045   |
| Country of survey                                     |                      |         |                           |         |
| Portugal                                              | 1                    |         | 1                         |         |
| Belgium                                               | 0.93 (0.75–1.16)     | 0.543   | 1.03 (0.76–1.39)          | 0.868   |
| Travelled abroad (after settling in the host country) |                      |         |                           |         |
| No                                                    | 1                    |         | 1                         |         |
| Yes                                                   | 1.39 (1.10–1.76)     | 0.006   | 1.35 (1.01–1.81)          | 0.043   |
| Type of last partner                                  |                      |         |                           |         |
| Casual                                                | 1                    |         | 1                         |         |
| Regular                                               | 4.50 (3.48–5.81)     | <0.001  | 4.19 (3.09–5.69)          | <0.001  |
| Origin of last partner                                |                      |         |                           |         |
| Non-African                                           | 1                    |         | 1                         |         |
| African                                               | 1.80 (1.41–2.30)     | <0.001  | 1.20 (0.89–1.62)          | 0.232   |
| Three or more sexual partners over the last year      |                      |         |                           |         |
| No                                                    | 1                    |         | 1                         |         |
| Yes                                                   | 0.45 (0.34–0.58)     | <0.001  | 0.84 (0.60–1.17)          | 0.307   |
| HIV status based on the last HIV test                 |                      |         |                           |         |
| Positive status                                       | 1                    |         | 1                         |         |
| Negative or unknown status                            | 2.91 (1.54–5.52)     | 0.001   | 5.11 (2.33–11.20)         | <0.001  |
| Never tested for HIV                                  | 3.42 (1.79–6.55)     | <0.001  | 8.01 (3.58–17.95)         | <0.001  |
| Self-reported STI                                     |                      |         |                           |         |
| Yes                                                   | 1                    |         | 1                         |         |
| No                                                    | 1.14 (0.83–1.55)     | 0.424   | 1.01 (0.71–1.45)          | 0.952   |

\* Adjusted to all variables

<https://doi.org/10.1371/journal.pone.0228584.t002>

of them, this sexual partner was an African (n = 19) and a regular partner living abroad (n = 14) or who had travelled with them (n = 2). Over a half of those who had condomless sex abroad were unaware of their HIV-positive status (n = 10 reported not being HIV positive based on their last HIV test and n = 3 reported never having been tested). Among participants with reactive HIV test-results who did not report sexual intercourse abroad (n = 50), over a third (n = 19) did not use condom during their last intercourse in the host country (Table 5).



**Table 3. Sexual behaviour when travelling abroad and in the host country post-migration.**

|                        | Had intercourse abroad (49.2%, n = 507) |      | No condom use during the last intercourse abroad (62.5%, n = 317) |      |           | Had intercourse in the host country (84.0%, n = 866) |      | No condom use during the last intercourse in the host country (70.7%, n = 612) |      |           |
|------------------------|-----------------------------------------|------|-------------------------------------------------------------------|------|-----------|------------------------------------------------------|------|--------------------------------------------------------------------------------|------|-----------|
|                        | n                                       | %    | n                                                                 | %    | p-value * | n                                                    | %    | n                                                                              | %    | p-value * |
| Type of last partner   |                                         |      |                                                                   |      |           |                                                      |      |                                                                                |      |           |
| Casual                 | 191                                     | 39.1 | 77                                                                | 41.4 | <0.001    | 209                                                  | 24.7 | 81                                                                             | 38.8 | <0.001    |
| Regular                | 297                                     | 60.9 | 235                                                               | 79.9 |           | 637                                                  | 75.3 | 518                                                                            | 81.3 |           |
| (missings)             | (19)                                    |      | (5)                                                               |      |           | (20)                                                 |      | (13)                                                                           |      |           |
| Origin of last partner |                                         |      |                                                                   |      |           |                                                      |      |                                                                                |      |           |
| African                | 406                                     | 83.4 | 270                                                               | 67.5 | 0.020     | 617                                                  | 72.2 | 460                                                                            | 74.6 | <0.001    |
| Other                  | 81                                      | 16.6 | 42                                                                | 53.2 |           | 237                                                  | 27.8 | 147                                                                            | 62.0 |           |
| (missings)             | (20)                                    |      | (5)                                                               |      |           | (12)                                                 |      | (5)                                                                            |      |           |

\* Comparison between those who used condom and those who did not.

<https://doi.org/10.1371/journal.pone.0228584.t003>

## Discussion

This bio-behavioural study explored the role of mobility in sexual risk taking and HIV acquisition among SAM residing in two European cities. Two thirds of the participants travelled to other countries after having settled, and for two thirds among them their destinations included African countries. The main findings show that SAM who travelled post-migration are at increased risk for HIV, reporting more condomless sex and concurrency than non-travellers, although engagement in sexual risk behaviours was found in the overall sample. HIV prevalence among the studied sample was 5% and a high proportion of 39% had never tested for HIV.

These findings on SAMs' mobility are in line with available research showing that migrants who become settled in host countries, visit their origin home countries and other destinations, whether for domestic, conjugal, social or economic purposes [17, 18]. The high HIV prevalence in this study points to a substantial HIV risk exposure in the studied samples,

**Table 4. Partner types and their origins at last sexual intercourse (abroad and in the host country).**

| Last sexual partner in the host country       | Last sexual partner abroad (in the last 5 years)* | N   | %    |
|-----------------------------------------------|---------------------------------------------------|-----|------|
| Type of partner                               |                                                   |     |      |
| Regular (69.7%, n = 239)                      | Met abroad/living abroad                          | 173 | 50.5 |
|                                               | Who travelled with                                | 66  | 19.2 |
| Casual (30.3%, n = 104)                       | Met abroad/living abroad                          | 95  | 27.7 |
|                                               | Who travelled with                                | 9   | 2.6  |
| Engagement in concurrent sexual relationships |                                                   | 147 | 38.7 |
| Origin of partner                             |                                                   |     |      |
| African (84.5%, n = 294)                      | African                                           | 255 | 73.3 |
|                                               | Non-African                                       | 18  | 5.2  |
| Non-African (15.5%, n = 54)                   | African                                           | 39  | 11.2 |
|                                               | Non-African                                       | 36  | 10.3 |

\* Sub-sample analysed: n = 380 (i.e. 75.0% of the 507 participants who had sex abroad). Missing data in type of partner = 37; missing data in origin of partner = 32.

<https://doi.org/10.1371/journal.pone.0228584.t004>

**Table 5. Mobility and sexual behaviour of HIV-positive participants.**

|                                    |                                            |                                                                                                                                                                                                                          |                                                                                                                                                                                                                         |                                                                                                                                                                                                                                                                                                                                                                                                                                                                                                                                                                                                                                                                                                                           |
|------------------------------------|--------------------------------------------|--------------------------------------------------------------------------------------------------------------------------------------------------------------------------------------------------------------------------|-------------------------------------------------------------------------------------------------------------------------------------------------------------------------------------------------------------------------|---------------------------------------------------------------------------------------------------------------------------------------------------------------------------------------------------------------------------------------------------------------------------------------------------------------------------------------------------------------------------------------------------------------------------------------------------------------------------------------------------------------------------------------------------------------------------------------------------------------------------------------------------------------------------------------------------------------------------|
| HIV-positive participants (n = 75) | Travelled to other countries (n = 47)      | Had intercourse abroad (n = 25)                                                                                                                                                                                          | Did not use condom abroad (n = 21)                                                                                                                                                                                      | <u>Type of partner when traveling</u> (missing = 1)<br>Casual partner, met abroad (n = 4)<br>Regular partner, who lives abroad (n = 14)<br>Regular partner, travelled with (n = 2)<br><hr/> <u>Origin of last partner when traveling</u> (missing = 1)<br>African (n = 19)<br>Other (n = 1)<br><hr/> Last intercourse was abroad (n = 7; 5 in Africa and 2 in Europe)<br>Last intercourse was in host country (n = 14):<br>- Used condom in last intercourse in host country (n = 4)<br>- Did not use condom in last intercourse in host country (n = 10)<br><hr/> Never tested for HIV (n = 3)<br>Negative or unknown status, based on the last HIV test (n = 10)<br>Positive status, based on the last HIV test (n = 8) |
|                                    |                                            |                                                                                                                                                                                                                          | Used condom abroad (n = 4)                                                                                                                                                                                              | <u>Type of partner when traveling</u><br>Casual partner, met abroad (n = 1)<br>Regular partner, who lives abroad (n = 1)<br>Regular partner, travelled with (n = 2)<br><hr/> <u>Origin of last partner when traveling</u><br>African (n = 4)<br><hr/> Last intercourse was abroad (n = 2; 1 in Africa and 1 in Europe)<br>Last intercourse was in host country (n = 2):<br>- Used condom in last intercourse in host country (n = 2)<br><hr/> Positive status, based on the last HIV test (n = 4)                                                                                                                                                                                                                         |
|                                    |                                            | Did not have intercourse abroad (n = 22)                                                                                                                                                                                 | Last intercourse was abroad (n = 3)<br>Last intercourse was in host country (n = 19):<br>- Used condom in last intercourse in host country (n = 11)<br>- Did not use condom in last intercourse in host country (n = 8) |                                                                                                                                                                                                                                                                                                                                                                                                                                                                                                                                                                                                                                                                                                                           |
|                                    | Did not travel to other countries (n = 28) | Last intercourse was abroad (n = 5)<br>Last intercourse was in host country (n = 22):<br>- Used condom in last intercourse in host country (n = 11)<br>- Did not use condom in last intercourse in host country (n = 11) |                                                                                                                                                                                                                         |                                                                                                                                                                                                                                                                                                                                                                                                                                                                                                                                                                                                                                                                                                                           |

<https://doi.org/10.1371/journal.pone.0228584.t005>

corroborating recent research on post-migration HIV acquisition in Europe [6, 13]. Research conducted in Africa has also shown that migrants adopt risky sexual behaviour while away from their home country compared to non-migrants [26–28]. In Europe, such specific studies are largely lacking, however, the few available studies showed that migrants’ mobility was associated with increased risk for HIV [17, 18, 29].

HIV risk while travelling is associated with individual risk behaviour: about two thirds of the travellers (63%) in our sample did not use a condom when having sex abroad. The use of condomless sex as an indicator for sexual risk behaviour could be discussed. It is important to understand factors such as relationship quality and context, sexual partner’s serostatus or uptake of other prevention means such as PrEP. However, while theoretically condomless sex may be seen not as a risk factor in long-term monogamous relationships, most HIV transmissions occur in the context of long-term relationships [30, 31], with a great body of evidence showing that many individuals in such relationships report sexual non-exclusivity and multiple sexual partners [32, 33]. PrEP uptake among heterosexual migrants in Europe so far has been extremely low [34,35]. Against this background, condomless sex in small sexual networks

with high proportions of late diagnoses [36] may indeed serve as a relevant outcome. The odds of not using a condom in the host country was five times higher when the last sexual intercourse abroad was also condomless. This may be associated with patterns of condomless sex, as 48.7% of travellers reported condomless sex both in host countries and abroad. It may indicate habit-forming of not using condoms [37], thus explaining risk behaviour when travelling. It shows the need for tailored prevention messages highlighting individual risk related to prevention behaviours, both in home and destination countries, as well as HIV prevention strategies on transnational levels.

In this study, three in four travellers reported that their last sexual partners in the host country and abroad were Africans, which is in line with previous research on assortative sexual mixing [38, 39]. Studies from the Netherlands and France showed that up to 80% of participants reported assortative sexual mixing in intra-African sexual networks [12, 40]. Other research on sexual mixing between high- and low-risk populations reported assortative mixing based on demographic rather than sexual characteristics [41]. Nevertheless, our study shows that disassortative sexual mixing also occurs, since 26.7% of the participants reported both African and non-African sexual partners.

About half of the travellers reported concurrency, mostly having a regular partner in the host country and other sexual partners abroad. In Belgium, this has been referred to as the culturally well-accepted “deuxieme bureau”, for instance among the Congolese community [42]. Condomless sex happened more often with a regular and an African partner indicating trust as a barrier to condom use within sexual relationships [43, 44]. Concurrent partnerships potentiate the spread of HIV by expanding sexual network size, enhancing network connectivity, and increasing rate and efficiency of disease transmission before individuals are aware of their infection [45, 46]. Our findings on concurrency show the fluid meaning of “regular partners”, which may not always be aligned with the definition usually adopted in epidemiological research. HIV prevention messages thus should consider culturally grounded sexual norms and their influence on individual risk perception. The latter has been described as low among African migrants [10] who therefore may have little demand for HIV prevention [47].

Overall, the proportion of condomless sex among the study sample was high (68.1%), corroborating high levels of risky sexual behaviours among migrant populations found in other research [48–50]. In our study, specific risk factors associated with condomless sex included being female, being  $\geq 30$  years old, having travelled, having had the last sexual encounter with a regular partner, having never been tested for HIV, and having a non-reactive test-result in the study. Epidemiological evidence shows that HIV risk for women is often associated with regular relationships, since interpersonal dynamics in long term relationships may act as a barrier to adopting protective behaviours [51]. Alongside, migration-related stressors including adaptation processes in host countries have been viewed as increasing migrants’ vulnerability for sexual health-related problems, such as HIV and other STI [52]. By having condomless sex in both their host country and their homeland, migrants may be at risk of cross-border transmission of HIV and other STI as documented elsewhere [53]. A study with travellers visiting clinics of a worldwide sentinel surveillance network found that travelling to visit friends and relatives was associated with diagnosed STI [54].

Belgium and Portugal are both countries with concentrated HIV epidemics with large proportions of migrant populations affected. The overall HIV prevalence found among the studied sample was five percent based on reactive HIV test result. This was significantly higher among women (6.7% compared to 3.8% among men). This reflects patterns of generalised HIV epidemics in SSA regions, as found in other European countries [55].

Currently, the identification of undiagnosed HIV is both a priority and a challenge to ensure the HIV continuum of care [56]. Our study confirms that this may indeed be the

weakest stage of the HIV cascade as our analysis revealed a high proportion of participants not knowing or not reporting their HIV status. The overall rate of 46.7% indicates that potentially one in two individuals could be undiagnosed. In addition, we found a high degree of participants who never tested for HIV: 27.1% in Antwerp and 49.7% in Lisbon. While similar results were described in other studies [47, 57, 58] potential under-reporting of known HIV status should also be considered. Our analysis showed particular high rates of unreported/undiagnosed HIV among women (i.e. 54.3%), especially among those of undocumented status. This may be surprising given that prenatal HIV screening offers constitute HIV testing opportunities for women in both countries. However, a recent study using mathematical modelling in Belgium showed that indeed women of sub-Saharan African origin have a high risk of being undiagnosed [59]. Migration status may be one of the structural factors impeding access [60, 61], but future research should explore this finding in more detail. HIV screening programs should consider this policy-practice gap, and invest more in further reducing thresholds to health care and HIV testing through tailored community-based initiatives [62] or in primary-care settings [63], in particular for women and those being undocumented.

Finally, our study indicates a considerable risk of onwards HIV transmission as highlighted by the high rate of unknown or unreported HIV status along with the occurrence of condomless sex associated to mobility among HIV-positive participants (assuming that those who knew their status were on treatment and thus could not transmit HIV). Secondary prevention to reduce sexual risk behaviours among HIV-positive migrants should be improved within overall efforts to promote knowledge of HIV-status and minimise transmission risk through timely treatment.

This study's strength lies in using data from two carefully designed, bio-behavioural surveys conducted in SSA community settings with a strong participatory research component. It resulted in comparable behavioural data for more than 1500 SAM living in two European cities. So far, this constitutes a unique approach in Europe. However, limitations must be acknowledged. The bio-behavioural surveys used were originally designed to assess HIV prevalence. The samples differ in terms of participants' ethnic origins. The observed heterogeneity reflects the historic links of Belgium and Portugal with sub-Saharan Africa due to their colonial past. We could not capture any cultural specificities and associated sexual norms and practices, which should be further investigated in future research. Using a set of common comparable core-variables further limited the potential covariates. Therefore, mobility could only be explored but not investigated in-depth. This paper focused only on international travel (including travels within and outside of Europe), not collecting information on smaller-scale mobility. Future research should also investigate the link between HIV risks and such mobility patterns, such as rural-urban movements on the search for work and better living conditions. Post-migration travel can be correlated with age and time in the country, two acknowledged factors for increased HIV risk [64–66], which may partially explain the association found between post-migration travel and HIV risk. Nevertheless, these findings highlight the need for prevention by supporting migrants in forming the habit of taking preventive measures when having sex abroad, especially among older and long-time resident migrants. Further behavioural information such as gender of sexual partners or type of sex (vaginal/anal) would be interesting to investigate in the context of risk and mobility. However, in both studies a community-based participatory research approach was applied throughout all the steps of the study including its conceptualization, in which the perspectives and concerns of the communities regarding conducting a survey on sensitive topics were taken into account. Besides community partners as members of community advisory boards, also community researchers who had insider knowledge, recommended not to ask sensitive questions, as many participants would not be willing to report socially undesirable behaviours. Therefore, it was agreed by the

project partners that no information such as sexual relations with same-sex partners and type of sex (vaginal/anal), that could be perceived as intrusive, would be collected. Self-reported data, in particular on sexual behaviour and HIV status, may have resulted in bias.

Despite the limitations, some meaningful conclusions with relevance for prevention can be drawn: many SAM are mobile after settling in their host countries, and obviously acquired patterns of sexual risk behaviour may not change when people travel. Sexual health promotion and HIV prevention strategies should thus incorporate specific travel advice, such as reinforcing condom promotion (including female condoms) and sexual risk reduction. Additional new prevention methods, i.e. Pre-Exposure Prophylaxis (PrEP), which so far has not been taken up by this group [67, 68] should also be promoted within combination prevention [34]. Mobile populations could benefit in particular from innovative biomedical prevention technologies in the pipeline such as long acting PrEP and HIV treatment, and delivery of these technologies to be easily accessible to community settings [69].

Our study shows the high need for promotion of HIV testing among mobile populations, which can be achieved through a mix of strategies, such as promotion of community-based HIV testing, self-testing and sampling [70] and provider-initiated HIV testing with consideration of human rights and gender aspects. The available European evidence should guide intensified efforts to reduce the proportion of undiagnosed HIV among mobile and migrant populations and ensure linkage to care [71].

This study has provided a first exploration of mobility as a driver of the HIV epidemic within mobile SSA migrant populations residing in Europe. Future studies employing mixed methods research should be conducted to provide a better understanding of the role of post-migration mobility in HIV risk. Such knowledge can inform HIV prevention and sexual health promotion in a transnational perspective with impact in both host countries and abroad.

## Supporting information

### **S1 File. Data base.**

(SAV)

### **S1 Table. Destination of travel of participants who travelled to other countries after having settled in the study country.**

(DOCX)

### **S2 Table. Additional information on self-reported HIV status and HIV rapid test results.**

(DOCX)

### **S3 Table. Additional information on condomless sex.**

(DOCX)

## Acknowledgments

The authors wish to thank all the study participants, the people/organisations providing the venues for data collection, and the following persons, all having contributed to this study: the Portuguese team of community researchers consisting of Emília Carreiras, Cristina Mora, Ângela Lacerda, Cristina Formosinho, Pedro Belo, Susana Campino, Andreia Pinto Ferreira, Ana Filipa Lopes, Ana Nunes, Joana Tavares de Almeida, Liliana Domingos, Luís Mendão, Edna Tavares, Adriana Curado, Diana Silva, Ricardo Fuertes and Vera Reigado. All the members of the community advisory board of the project. The Belgian team of community researchers consisting of Sophiah Atieno, John Che Akangwa, Sandra Karorero, John Mugabi, Eveline Pilime, Jean Senga, Electa Tamasang and Daniel Tantoh, and the research assistants

Fiona Namanya and Janvier Muhizi. The additional members of the Belgian community advisory board: Laura Albers (Helpcenter-ITM), Rans Aubin (Ghana Welfare), Florent Batoum Bahiengraga (ACASIA vzw), Erika Delporte (ARC, ITM), Levis Kadia (Bilenge vzw), Tine Vermoesen (ARL, ITM), Hans Willems (City of Antwerp). Finally, authors wish to thank the Scientific Fund for Research on AIDS, managed by the King Baudouin Foundation for financially supporting the Belgian project, and the Directorate-General for Health—National Program for the Prevention and Control of HIV/AIDS Infection for financially supporting the Portuguese project.

## Author Contributions

**Conceptualization:** Sónia Dias, Jasna Loos, Christiana Nöstlinger.

**Data curation:** Sónia Dias, Jasna Loos.

**Formal analysis:** Ana Gama, Luis Roxo.

**Funding acquisition:** Sónia Dias, Jasna Loos, Christiana Nöstlinger.

**Investigation:** Sónia Dias, Ana Gama, Jasna Loos, Daniel Simões, Christiana Nöstlinger.

**Methodology:** Sónia Dias, Jasna Loos, Christiana Nöstlinger.

**Project administration:** Sónia Dias, Jasna Loos.

**Supervision:** Sónia Dias, Christiana Nöstlinger.

**Visualization:** Sónia Dias, Ana Gama, Luis Roxo, Christiana Nöstlinger.

**Writing – original draft:** Sónia Dias, Ana Gama, Christiana Nöstlinger.

**Writing – review & editing:** Sónia Dias, Ana Gama, Jasna Loos, Luis Roxo, Daniel Simões, Christiana Nöstlinger.

## References

1. ECDC. HIV/AIDS surveillance in Europe 2018–2017 data. Copenhagen: WHO; 2018.
2. Hernando V, Alvarez-del Arco D, Alejos B, Monge S, Amato-Gauci AJ, Noori T, et al. HIV Infection in Migrant Populations in the European Union and European Economic Area in 2007–2012: An Epidemic on the Move. *Journal of acquired immune deficiency syndromes (1999)*. 2015; 70(2):204–11.
3. Health Slop. Epidemiologie van HIV en AIDS in België. Toestand op 31 december 2016. 2017.
4. Jorge INdSDR. Infecção VIH e SIDA: a situação em Portugal a 31 de dezembro de 2016. Lisbon, Portugal: Instituto Nacional de Saúde Doutor Ricardo Jorge; 2017. Contract No.: 148.
5. Cassels S, Jenness SM, Khanna AS. Conceptual framework and research methods for migration and HIV transmission dynamics. *AIDS and behavior*. 2014; 18(12):2302–13. <https://doi.org/10.1007/s10461-013-0665-z> PMID: 24257897
6. Alvarez-Del Arco D, Fakoya I, Thomadakis C, Pantazis N, Touloumi G, Gennotte AF, et al. High levels of postmigration HIV acquisition within nine European countries. *AIDS (London, England)*. 2017; 31(14):1979–88.
7. ECDC. Migrant health: Epidemiology of HIV and AIDS in migrant communities and ethnic minorities in EU/EEA countries. Stockholm, Sweden: ECDC; 2010.
8. Fakoya I, Álvarez-del Arco D, Woode-Owusu M, Monge S, Rivero-Montesdeoca Y, Delpech V, et al. A systematic review of post-migration acquisition of HIV among migrants from countries with generalised HIV epidemics living in Europe: implications for effectively managing HIV prevention programmes and policy. *BMC public health*. 2015; 15(1):561.
9. Deane KD, Parkhurst JO, Johnston D. Linking migration, mobility and HIV. *Tropical medicine & international health: TM & IH*. 2010; 15(12):1458–63.
10. Manirankunda L, Loos J, Alou TA, Colebunders R, Nostlinger C. "It's better not to know": perceived barriers to HIV voluntary counseling and testing among sub-Saharan African migrants in Belgium. *AIDS*

- education and prevention: official publication of the International Society for AIDS Education. 2009; 21(6):582–93.
11. Prost A, Elford J, Imrie J, Petticrew M, Hart GJ. Social, behavioural, and intervention research among people of Sub-Saharan African origin living with HIV in the UK and Europe: literature review and recommendations for intervention. *AIDS and behavior*. 2008; 12(2):170–94. <https://doi.org/10.1007/s10461-007-9237-4> PMID: 17497218
  12. Marsicano E, Lydie N, Bajos N. 'Migrants from over there' or 'racial minority here'? Sexual networks and prevention practices among sub-Saharan African migrants in France. *Culture, health & sexuality*. 2013; 15(7):819–35.
  13. Desgrees-du-Lou A, Pannetier J, Ravalihasy A, Le Guen M, Gosselin A, Panjo H, et al. Is hardship during migration a determinant of HIV infection? Results from the ANRS PARCOURS study of sub-Saharan African migrants in France. *AIDS (London, England)*. 2016; 30(4):645–56.
  14. Migration IOo. *Diaspora and Development: Bridging Societies and States*. Geneva, Switzerland: International Organization of Migration 2013. Contract No.: 22.
  15. Tanton C, Johnson AM, Macdowall W, Datta J, Clifton S, Field N, et al. Forming new sex partnerships while overseas: findings from the third British National Survey of Sexual Attitudes & Lifestyles (Natsal-3). *Sex Transm Infect*. 2016;sextrans-2015-052459.
  16. Loos J, Nostlinger C, Vuylsteke B, Deblonde J, Ndungu M, Kint I, et al. First HIV prevalence estimates of a representative sample of adult sub-Saharan African migrants in a European city. Results of a community-based, cross-sectional study in Antwerp, Belgium. *PloS one*. 2017; 12(4):e0174677. <https://doi.org/10.1371/journal.pone.0174677> PMID: 28380051
  17. Kramer MA, van den Hoek A, Coutinho RA, Prins M. Sexual risk behaviour among Surinamese and Antillean migrants travelling to their countries of origin. *Sex Transm Infect*. 2005; 81(6):508–10. <https://doi.org/10.1136/sti.2004.014282> PMID: 16326856
  18. Fenton KA, Chinouya M, Davidson O, Copas A. HIV transmission risk among sub-Saharan Africans in London travelling to their countries of origin. *AIDS (London, England)*. 2001; 15(11):1442–5.
  19. UNAIDS/WHO. *Initiating second generation HIV surveillance systems: practical guidelines*. Geneva, Switzerland: UNAIDS; 2002.
  20. Czaika M, De Haas H. The globalization of migration: Has the world become more migratory? *International Migration Review*. 2014; 48(2):283–323.
  21. Dias S. *Final Report of the Project "Immigrants and HIV/Aids"*. Lisboa, Portugal: Direção-Geral da Saúde; 2015.
  22. Nostlinger C, Loos J. Involving lay community researchers in epidemiological research: experiences from a seroprevalence study among sub-Saharan African migrants. *AIDS care*. 2016; 28 Suppl 1:119–23.
  23. Dias S, Gama A, Simoes D, Mendao L. Implementation Process and Impacts of a Participatory HIV Research Project with Key Populations. *BioMed research international*. 2018; 2018:5845218. <https://doi.org/10.1155/2018/5845218> PMID: 29955605
  24. Muhib FB, Lin LS, Stueve A, Miller RL, Ford WL, Johnson WD, et al. A venue-based method for sampling hard-to-reach populations. *Public health reports (Washington, DC: 1974)*. 2001; 116 Suppl 1:216–22.
  25. Dias S, Gama A, Abrantes P, Gomes I, Fonseca M, Reigado V, Simões D, Carreiras E, Mora C, Ferreira AP, Akpogheneta O, Martins MO. Patterns of sexual risk behavior, HIV infection and use of health services among sub-Saharan African migrants in Portugal. *J Sex Res*. 2019. <https://doi.org/10.1080/00224499.2019.1601154> PMID: 31002270
  26. Camlin CS, Kwena ZA, Dworkin SL, Cohen CR, Bukusi EA. "She mixes her business": HIV transmission and acquisition risks among female migrants in western Kenya. *Social science & medicine (1982)*. 2014; 102:146–56.
  27. McGrath N, Eaton JW, Newell ML, Hosegood V. Migration, sexual behaviour, and HIV risk: a general population cohort in rural South Africa. *The lancet HIV*. 2015; 2(6):e252–9. [https://doi.org/10.1016/S2352-3018\(15\)00045-4](https://doi.org/10.1016/S2352-3018(15)00045-4) PMID: 26280016
  28. Olawore O, Tobian AAR, Kagaayi J, Bazaale JM, Nantume B, Kigozi G, et al. Migration and risk of HIV acquisition in Rakai, Uganda: a population-based cohort study. *The lancet HIV*. 2018; 5(4):e181–e9. [https://doi.org/10.1016/S2352-3018\(18\)30009-2](https://doi.org/10.1016/S2352-3018(18)30009-2) PMID: 29490875
  29. Davies AA, Basten A, Frattini C. Migration: a social determinant of the health of migrants. *Eurohealth*. 2009; 16(1):10–2.
  30. Dunkle KL, Stephenson R, Karita E, Chomba E, Kayitenkore K, Vwalika C, et al. New heterosexually transmitted HIV infections in married or cohabiting couples in urban Zambia and Rwanda: an analysis of survey and clinical data. *Lancet*. 2008; 371:2183–91. [https://doi.org/10.1016/S0140-6736\(08\)60953-8](https://doi.org/10.1016/S0140-6736(08)60953-8) PMID: 18586173

31. Sullivan PS, Salazar L, Buchbinder S, Sanchez TH. Estimating the proportion of HIV transmissions from main sex partners among men who have sex with men in five US cities. *Aids*. 2009; 23(9):1153–62. <https://doi.org/10.1097/QAD.0b013e32832baa34> PMID: 19417579
32. Lehmillier JJ. A comparison of sexual health history and practices among monogamous and consensually nonmonogamous sexual partners. *The Journal of Sexual Medicine*. 2012; 12:2022–8.
33. Swan DJ, Thompson SC. Monogamy, the protective fallacy: Sexual versus emotional exclusivity and the implication for sexual health risk. *Journal of Sex Research*. 2016; 53:64–73. <https://doi.org/10.1080/00224499.2014.1003771> PMID: 26169361
34. Loos J, Nostlinger C, Reyniers T, Colebunders R, Jaspers V, Manirankunda L, et al. PrEP for African migrants in Europe? A research agenda. *The lancet HIV*. 2016; 3(11):e505–e7. [https://doi.org/10.1016/S2352-3018\(16\)30173-4](https://doi.org/10.1016/S2352-3018(16)30173-4) PMID: 27788864
35. McCormack SM, Nosedá V, Molina J.M. PrEP in Europe—expectations, opportunities and barriers. *Journal of the International AIDS Society*. 2016; 19:21103. <https://doi.org/10.7448/IAS.19.7.21103> PMID: 27760681
36. Fakoya I, Álvarez-Del Arco D, Monge S, Copas AJ, Gennotte AF, Volny-Anne A, et al. HIV testing history and access to treatment among migrants living with HIV in Europe. *Journal of the International AIDS Society*. 2018; 21:e25123. <https://doi.org/10.1002/jia2.25123> PMID: 30027686
37. Judah G, Gardner B, Aunger R. Forming a flossing habit: an exploratory study of the psychological determinants of habit formation. *British journal of health psychology*. 2013; 18(2):338–53. <https://doi.org/10.1111/j.2044-8287.2012.02086.x> PMID: 22989272
38. Burns F, Fenton KA. Access to HIV care among migrant Africans in Britain. What are the issues? *Psychology, health & medicine*. 2006; 11(1):117–25.
39. Dodds C. HIV-related stigma in England: experiences of gay men and heterosexual African migrants living with HIV. *Journal of Community & Applied Social Psychology*. 2006; 16(6):472–80.
40. van Veen MG, Kramer MA, Op de Coul EL, van Leeuwen AP, de Zwart O, van de Laar MJ, et al. Dissortative sexual mixing among migrant populations in The Netherlands: a potential for HIV/STI transmission? *AIDS care*. 2009; 21(6):683–91. <https://doi.org/10.1080/09540120802511984> PMID: 19806484
41. Prah P, Copas AJ, Mercer CH, Nardone A, Johnson AM. Patterns of sexual mixing with respect to social, health and sexual characteristics among heterosexual couples in England: analyses of probability sample survey data. *Epidemiology and infection*. 2015; 143(7):1500–10. <https://doi.org/10.1017/S0950268814002155> PMID: 25167088
42. Demart S. Genre et transgression des normes morales et sexuelles dans les Églises de Réveil à Kinshasa et en diaspora. *Cahiers d'études africaines*. 2013(4):783–811.
43. Senn TE, Scott-Sheldon LA, Carey MP. Relationship-specific condom attitudes predict condom use among STD clinic patients with both primary and non-primary partners. *AIDS and behavior*. 2014; 18(8):1420–7. <https://doi.org/10.1007/s10461-014-0726-y> PMID: 24567031
44. Farrington EM, Bell DC, DiBacco AE. Reasons People Give for Using (or Not Using) Condoms. *AIDS and behavior*. 2016; 20(12):2850–62. <https://doi.org/10.1007/s10461-016-1352-7> PMID: 26969001
45. Aral SO. Partner Concurrency and the STD/HIV Epidemic. *Current infectious disease reports*. 2010; 12(2):134–9. <https://doi.org/10.1007/s11908-010-0087-2> PMID: 21308509
46. Rosenberg ES, Rothenberg RB, Kleinbaum DG, Stephenson RB, Sullivan PS. The implications of respondent concurrency on sex partner risk in a national, web-based study of men who have sex with men in the United States. *Journal of acquired immune deficiency syndromes (1999)*. 2013; 63(4):514–21.
47. Alvarez-del Arco D, Monge S, Azcoaga A, Rio I, Hernando V, Gonzalez C, et al. HIV testing and counselling for migrant populations living in high-income countries: a systematic review. *European journal of public health*. 2013; 23(6):1039–45. <https://doi.org/10.1093/eurpub/cks130> PMID: 23002238
48. Burns FM, Evans AR, Mercer CH, Parutis V, Gerry CJ, Mole RC, et al. Sexual and HIV risk behaviour in central and eastern European migrants in London. *Sex Transm Infect*. 2011; 87(4):318–24. <https://doi.org/10.1136/sti.2010.047209> PMID: 21593470
49. Dias S, Marques A, Gama A, Martins MO. HIV risky sexual behaviors and HIV infection among immigrants: a cross-sectional study in Lisbon, Portugal. *International journal of environmental research and public health*. 2014; 11(8):8552–66. <https://doi.org/10.3390/ijerph110808552> PMID: 25141001
50. Peach E, Lemoh C, Stoove M, Agius P, El Hayek C, Higgins N, et al. Aiming for 90-90-90—the importance of understanding the risk factors for HIV exposure and advanced HIV infection in migrant populations and other groups who do not report male-to-male sex. *Sexual health*. 2018.
51. Stevens PE, Galvao L. "He won't use condoms": HIV-infected women's struggles in primary relationships with serodiscordant partners. *American journal of public health*. 2007; 97(6):1015–22. <https://doi.org/10.2105/AJPH.2005.075705> PMID: 17463377



52. Rade DA, Crawford G, Lobo R, Gray C, Brown G. Sexual Health Help-Seeking Behavior among Migrants from Sub-Saharan Africa and South East Asia living in High Income Countries: A Systematic Review. *International journal of environmental research and public health*. 2018; 15(7).
53. Kramer MA, van Veen MG, de Coul EL, Geskus RB, Coutinho RA, van de Laar MJ, et al. Migrants travelling to their country of origin: a bridge population for HIV transmission? *Sex Transm Infect*. 2008; 84(7):554–5. <https://doi.org/10.1136/sti.2008.032094> PMID: 18653565
54. Matteelli A, Schlagenhauf P, Carvalho AC, Weld L, Davis XM, Wilder-Smith A, et al. Travel-associated sexually transmitted infections: an observational cross-sectional study of the GeoSentinel surveillance database. *The Lancet Infectious diseases*. 2013; 13(3):205–13. [https://doi.org/10.1016/S1473-3099\(12\)70291-8](https://doi.org/10.1016/S1473-3099(12)70291-8) PMID: 23182931
55. ECDC. HIV/AIDS surveillance in Europe 2017–2016 data. Stockholm, Sweden: ECDC; 2017.
56. Van Beckhoven D, Florence E, Ruelle J, Deblonde J, Verhofstede C, Callens S, et al. Good continuum of HIV care in Belgium despite weaknesses in retention and linkage to care among migrants. *BMC infectious diseases*. 2015; 15:496. <https://doi.org/10.1186/s12879-015-1230-3> PMID: 26530500
57. Dias S, Gama A, Severo M, Barros H. Factors associated with HIV testing among immigrants in Portugal. *International journal of public health*. 2011; 56(5):559–66. <https://doi.org/10.1007/s00038-010-0215-7> PMID: 21057852
58. Gama A, Fraga S, Dias S. Impact of socio-demographic factors on HIV testing among African immigrants in Portugal. *Journal of immigrant and minority health*. 2010; 12(6):841–6. <https://doi.org/10.1007/s10903-010-9324-x> PMID: 20157850
59. Marty L, Van Beckhoven D, Ost C, Deblonde J, Costaglioloa D, sasse A, Supervie V & the HERMETIC Study group. Estimates of the HIV undiagnosed population in Belgium reveals higher prevalence for MSM with foreign nationality and for geographic areas hosting big cities. *J Int AIDS Soc*, 2011; 22(8): e25371. <https://doi.org/10.1002/jia2.25371> PMID: 31424626
60. Boerleider AW, Wiegers TA, Mannien J, Francke AL, Deville WL. Factors affecting the use of prenatal care by non-western women in industrialized western countries: a systematic review. *BMC pregnancy and childbirth*. 2013; 13:81. <https://doi.org/10.1186/1471-2393-13-81> PMID: 23537172
61. Almeida LM, Caldas J, Ayres-de-Campos D, Salcedo-Barrientos D, Dias S. Maternal healthcare in migrants: a systematic review. *Maternal and child health journal*. 2013; 17(8):1346–54. <https://doi.org/10.1007/s10995-012-1149-x> PMID: 23334357
62. Pottie K, Lottfi T, Kilzar L, Howeiss P, Rizk N, Akl EA, et al. The Effectiveness and Cost-Effectiveness of Screening for HIV in Migrants in the EU/EEA: A Systematic Review. *International journal of environmental research and public health*. 2018; 15(8).
63. Deblonde J, Van Beckhoven D, Loos J, Boffin N, Sasse A, Nostlinger C, et al. HIV testing within general practices in Europe: a mixed-methods systematic review. *BMC Public Health*. 2018; 18(1):1191. <https://doi.org/10.1186/s12889-018-6107-0> PMID: 30348140
64. Alvarez-Del Arco D, Fakoya I, Thomadakis C, Pantazis N, Touloumi G, Gennotte AF, et al. Advancing Migrant Access to Health Services in Europe (aMASE) study team. High levels of postmigration HIV acquisition within nine European countries. *Aids*. 2017; 31(14):1979–88. <https://doi.org/10.1097/QAD.0000000000001571> PMID: 28857779
65. Desgrées-du-Loû A, Pannetier J, Ravalihasy A, Gosselin A, Supervie V, Panjo H, et al. The Parcours Study Group5. Sub-Saharan African migrants living with HIV acquired after migration, France, ANRS PARCOURS study, 2012 to 2013. *Euro surveillance*. 2015; 20(46):pii = 30065.
66. Tavoschi L, Dias JG, Pharris A. New HIV diagnoses among adults aged 50 years or older in 31 European countries, 2004–15: an analysis of surveillance data. *The lancet HIV* 2017; 4:e514–21. [https://doi.org/10.1016/S2352-3018\(17\)30155-8](https://doi.org/10.1016/S2352-3018(17)30155-8) PMID: 28967582
67. Hadj L, Desgrées du Loû A, Dupont J, Nguyen V. Acceptabilité et freins chez les populations africaines et caribéennes vivant en Ile-de-France d'une nouvelle offre de prévention du VIH: le Truvada en prophylaxie pré-exposition (PrEP): une enquête exploratoire. *Bulletin Epidemiologique Hebdomadaire*. 2017; 6:110–4.
68. Molina JM. PrEP rollout in France. 21st International AIDS Conference; Durban, South Africa 2016.
69. Camlin CS, Cassels S, Seeley J. Bringing population mobility into focus to achieve HIV prevention goals. *Journal of the International AIDS Society*. 2018; 21 Suppl 4:e25136.
70. Sharma M, Ying R, Tarr G, Barnabas R. Systematic review and meta-analysis of community and facility-based HIV testing to address linkage to care gaps in sub-Saharan Africa. *Nature*. 2015; 528(7580): S77–85. <https://doi.org/10.1038/nature16044> PMID: 26633769
71. EDAT EH. Guide to best practices to improve early testing and care among migrant populations in Europe. Pantin Cedex: Association AIDES; 2017.
